# Supplementary material
Source: PubMed Central journal article supplement (PMC7980473)
Supplement: pnas.2023955118.sapp.pdf [file pnas.2023955118.sapp.pdf]

# PNAS

[www.pnas.org](http://www.pnas.org)

Supplementary Information for

**Clutch mechanism of chemo-mechanical coupling in a  
DNA resecting motor-nuclease**

Mihaela-Carmen Unciuleac, Aviv Meir, Chaoyou Xue, Garrett M. Warren,  
Eric C. Greene, and Stewart Shuman

Corresponding author: Stewart Shuman  
Email: [s-shuman@ski.mskcc.org](mailto:s-shuman@ski.mskcc.org)

This PDF file includes:

Figures S1, S2

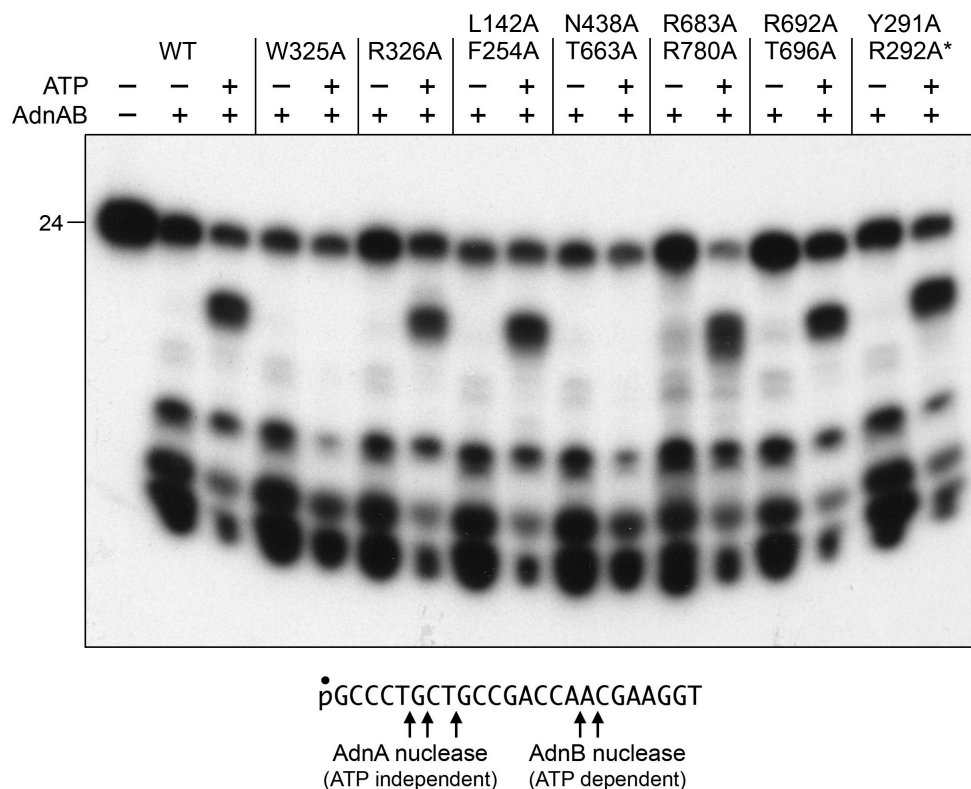

Figure S1. **AdnB mutations W325A and N438A-T663A uncouple ATP hydrolysis from ssDNA translocation.** Reaction mixtures (10  $\mu$ l) containing 20 mM Tris-HCl (pH 8.0), 2 mM MgCl<sub>2</sub>, 1 mM DTT, 0.1  $\mu$ M 5' <sup>32</sup>P-labeled ssDNA substrate (shown at bottom), 1 mM ATP, and 0.1 pmol wild-type or mutant AdnAB (where indicated by +) were incubated for 20 min at 37°C. The reactions were quenched by adjustment of the mixtures to 45% formamide and 25 mM EDTA. The products were analyzed by electrophoresis through a 15-cm 18% polyacrylamide gel containing 7 M urea in 45 mM Tris-borate and 1.2 mM EDTA and then visualized by autoradiography. The sites of cleavage of the 24-mer ssDNA by the AdnA and AdnB nuclease domains are indicated by arrows at bottom.

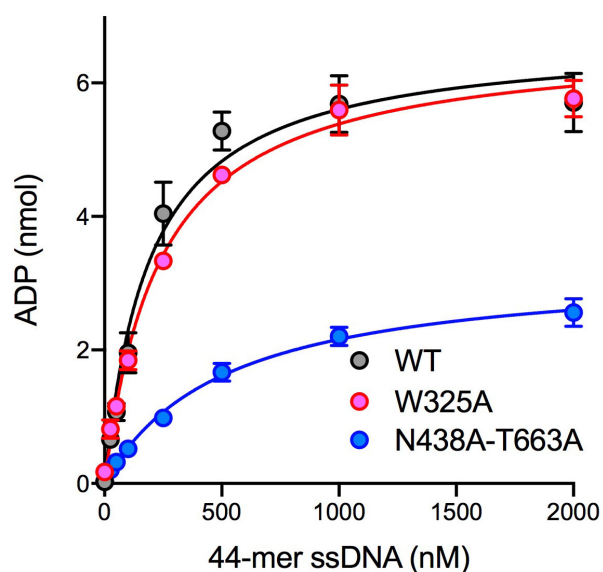

Figure S2. **Dependence of ATP hydrolysis on ssDNA concentration.** Reaction mixtures (10  $\mu$ l) containing 20 mM Tris-HCl, pH 8.0, 1 mM DTT, 2 mM  $\text{MgCl}_2$ , 1 mM  $[\alpha^{32}\text{P}]\text{ATP}$ , 25 nM wild-type (WT) or mutant AdnAB as specified, and 0, 25, 50, 100, 250, 500, 1000, or 2000 nM 44-mer ssDNA oligodeoxynucleotide were incubated at 37°C for 10 min. The extents of ATP hydrolysis are plotted as a function of ssDNA concentration. Each datum is the average of three independent titration experiments  $\pm$ SEM. Nonlinear regression curve fits of the data to the Michaelis Menten equation are shown. The apparent  $K_m$  values for ssDNA (calculated in Prism) were as follows: wild-type AdnAB =  $192 \pm 33$  nM; W325A =  $236 \pm 25$  nM; N438A-T663A =  $511 \pm 74$  nM. The extents of ATP hydrolysis extrapolated to saturating ssDNA (output as  $V_{\text{max}}$  in Prism) were: WT =  $6.68 \pm 0.34$  nmol; W325A =  $6.66 \pm 0.22$  nmol; N438A-T663A =  $3.26 \pm 0.18$  nmol.
